# Supplementary material for: Lattice evolution and enhanced piezoelectric properties of hydrothermally synthesised 0.94(Bi0.5Na0.5)TiO3–0.06BaTiO3nanofibers
Source: Royal Society of Chemistry journal article supplement (doi:10.1039/c7tc03812g), 2017-01-01
Supplement: c7tc03812g1.pdf [file c7tc03812g1.pdf]

Supplementary Information

### Lattice evolution and enhanced piezoelectric properties of hydrothermally-synthesised $0.94(\text{Bi}_{0.5}\text{Na}_{0.5})\text{TiO}_3\text{-}0.06\text{BaTiO}_3$ nanofibers

Mohammad Bagher Ghasemian,<sup>a</sup> Aditya Rawal,<sup>b</sup> Feifei Wang,<sup>\*c</sup> Dewei Chu,<sup>a</sup> and Danyang Wang<sup>\*a</sup>

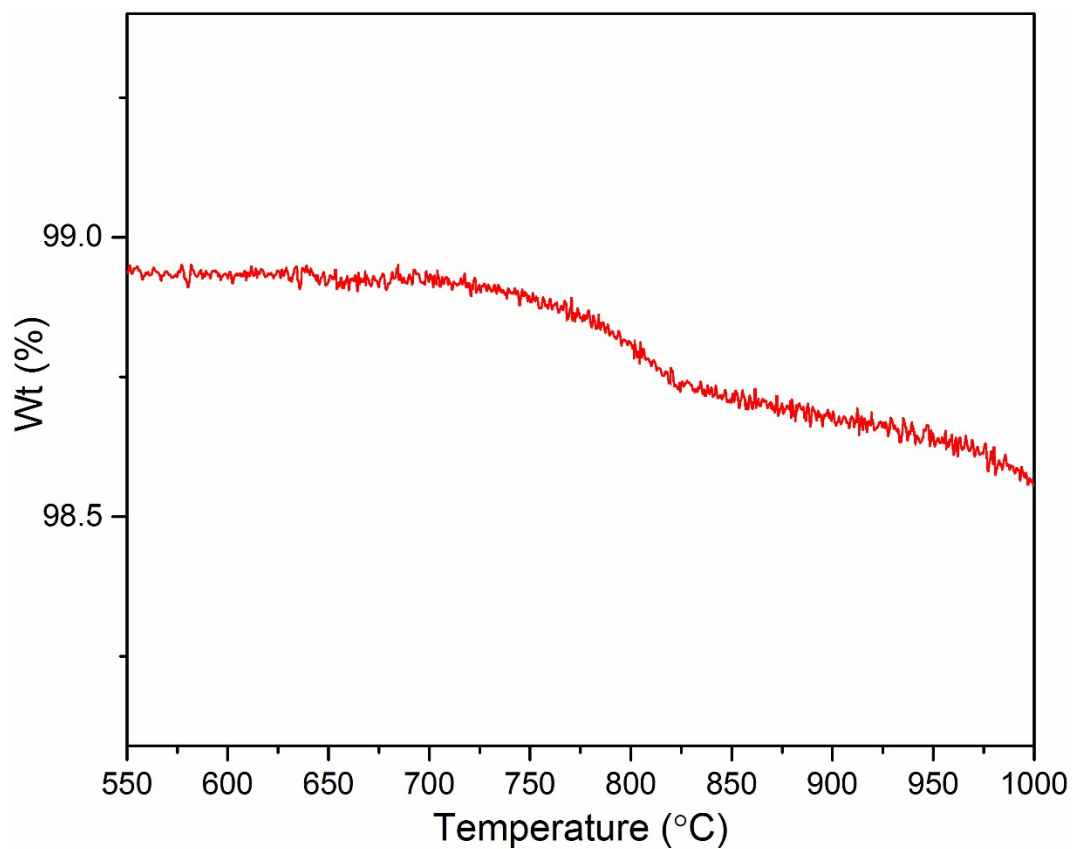

Fig. S1 TGA analysis of BNBT nanofibers.

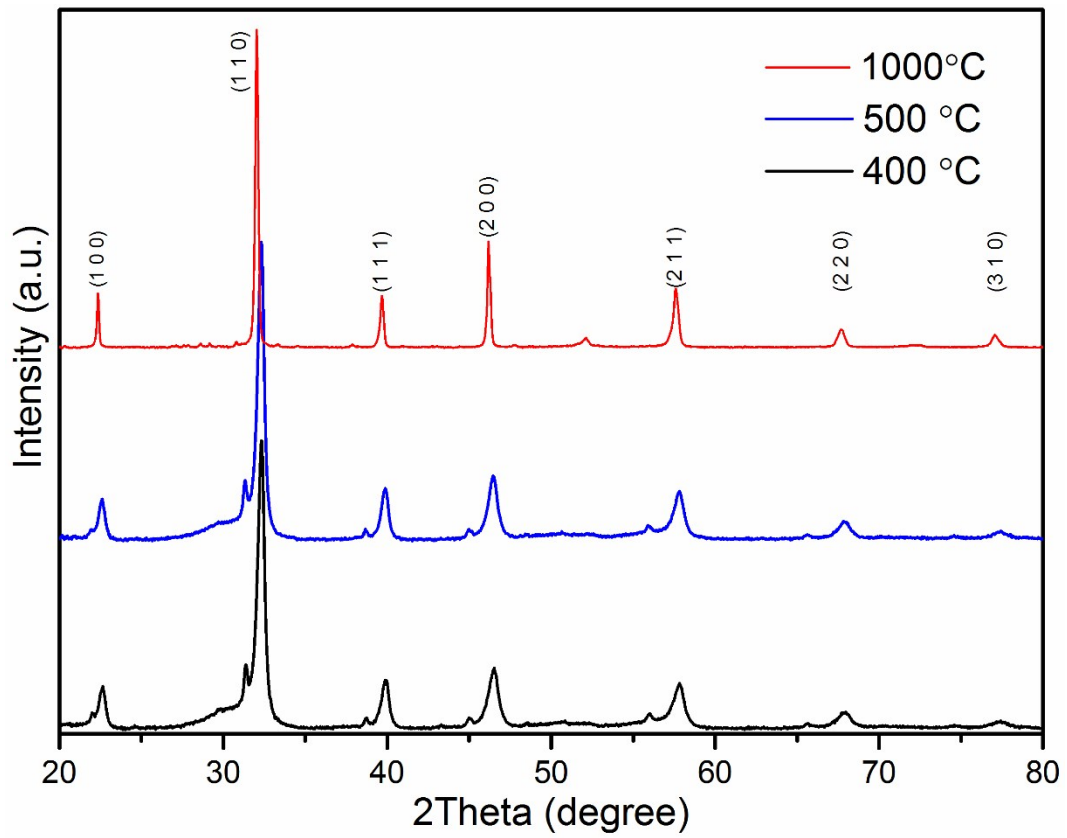

Fig. S2 XRD patterns of BNBT nanofibers annealed at different temperatures for 6 hours.

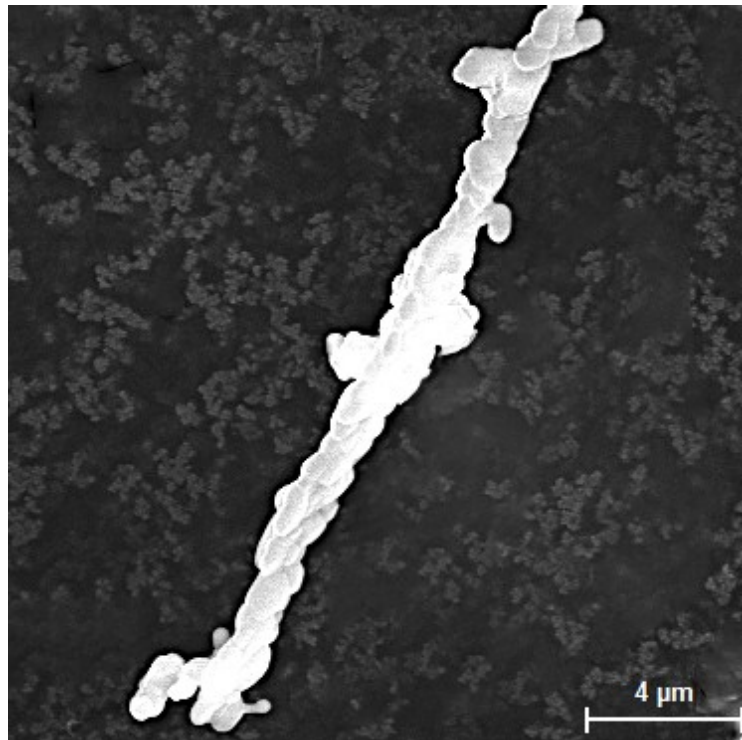

Fig. S3 SEM image of BNBT nanofibers annealed at 1000 °C for 6 hours.
